# Supplementary material for: Phenolic Compounds from Belamcanda chinensis Seeds
Source: PubMed Central journal article supplement (PMC6017503; doi:10.3390/molecules23030580), 2018-03-05
Supplement: molecules-23-00580-s001.pdf [file molecules-23-00580-s001.pdf]

# Supplementary Information

## Phenolic compounds from *Belamcanda chinensis* seeds

Ying-Ying Song<sup>1,2</sup>, Ying Liu<sup>3</sup>, Yong-Ming Yan<sup>3</sup>, Xi-Feng Lu<sup>3\*</sup> and Yong-Xian Cheng<sup>3,4\*</sup>

<sup>1</sup> *State Key Laboratory of Phytochemistry and Plant Resources in West China, Kunming Institute of Botany, Chinese Academy of Sciences, Kunming 650201, China; songyingying@mail.kib.ac.cn*

<sup>2</sup> *University of Chinese Academy of Sciences, Beijing 100049, China*

<sup>3</sup> *Guangdong Key Laboratory for Genome Stability & Disease Prevention, School of Pharmaceutical Sciences, Shenzhen University Health Science Center, Shenzhen 518060, China; cdzyb083@sina.com (Y.L.); yanym@szu.edu.cn (Y.-M.Y.)*

<sup>4</sup> *College of Pharmacy, Henan University of Chinese Medicine, Zhengzhou 450008, China*

\* Correspondence: x.lu@szu.edu.cn (X.-F.L.); yxcheng@szu.edu.cn (Y.-X.C.);  
Tel./Fax: (+86) 0755-8671-3994

## Content

- Figure S1. GC analysis of the derivative of D-fructose
- Figure S2. GC analysis of the derivative of L- fructose
- Figure S3. GC analysis of the derivativ of D-glucose
- Figure S4. GC analysis of the derivative of L-glucose
- Figure S5. GC analysis of the derivative of compound **1** after hydrolysis
- Figure S6. GC analysis of the derivative of compound **2** after hydrolysis
- Figure S7. The  $^1\text{H}$  NMR spectrum of **1** in  $\text{CD}_3\text{OD}$
- Figure S8. The  $^{13}\text{C}$  NMR and DEPT spectra of **1** in  $\text{CD}_3\text{OD}$
- Figure S9.  $^1\text{H}$ - $^1\text{H}$  COSY spectrum of **1** in  $\text{CD}_3\text{OD}$
- Figure S10. HSQC spectrum of **1** in  $\text{CD}_3\text{OD}$
- Figure S11. HMBC spectrum of **1** in  $\text{CD}_3\text{OD}$
- Figure S12. ROESY spectrum of **1** in  $\text{CD}_3\text{OD}$
- Figure S13. CD spectrum of **1**
- Figure S14. UV spectrum of **1**
- Figure S15. HRESIMS of **1**
- Figure S16. The  $^1\text{H}$  NMR spectrum of **2** in  $\text{CD}_3\text{OD}$
- Figure S17. The  $^{13}\text{C}$  NMR and DEPT spectra of **2** in  $\text{CD}_3\text{OD}$
- Figure S18.  $^1\text{H}$ - $^1\text{H}$  COSY spectrum of **2**
- Figure S19. HSQC spectrum of **2**
- Figure S20. HMBC spectrum of **2**
- Figure S21. ROESY spectrum of **2**
- Figure S22. CD spectrum of **2**
- Figure S23. UV spectrum of **2**
- Figure S24. HRESIMS of **2**



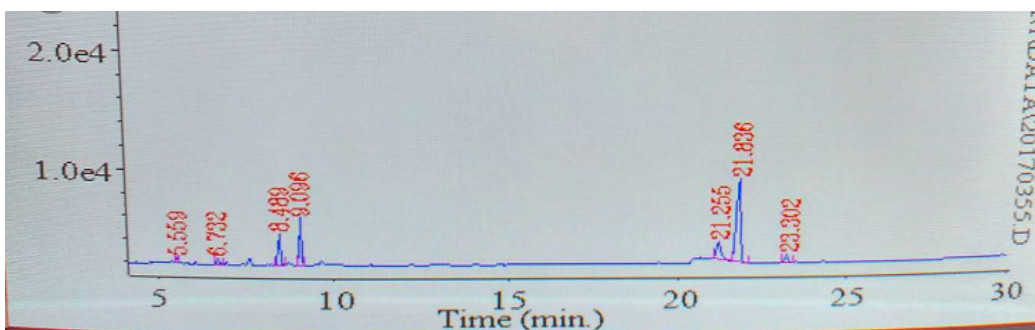

Figure S4. GC analysis of the derivative of L-glucose

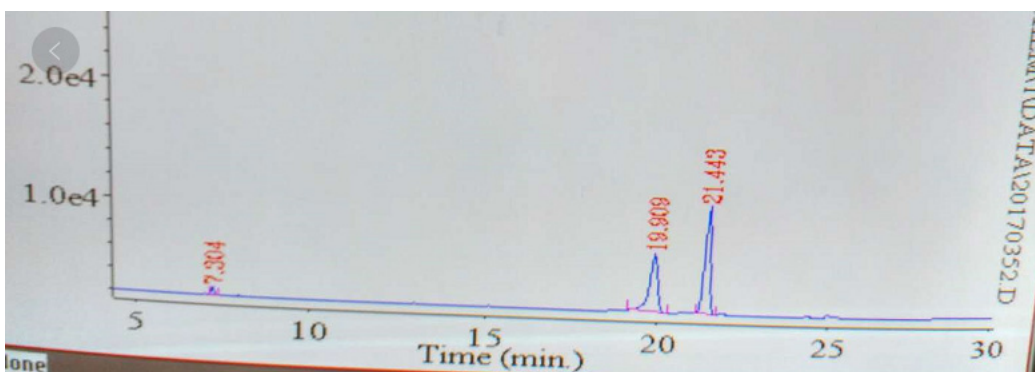

Figure S5. GC analysis of the derivative of compound 1 after hydrolysis

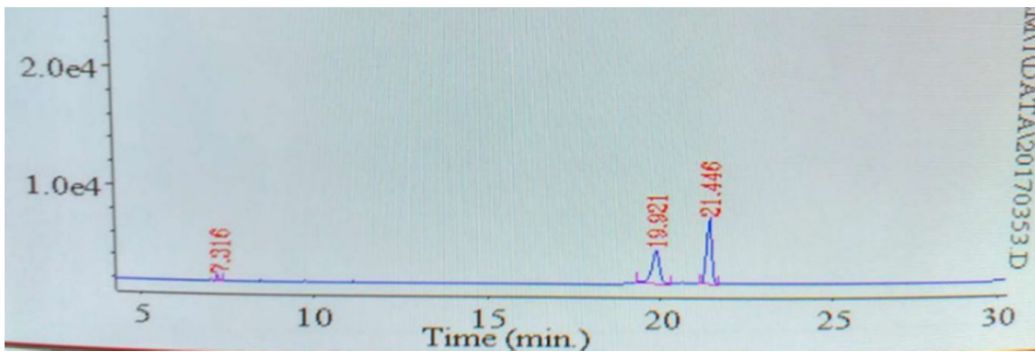

Figure S6. GC analysis of the derivative of compound 2 after hydrolysis

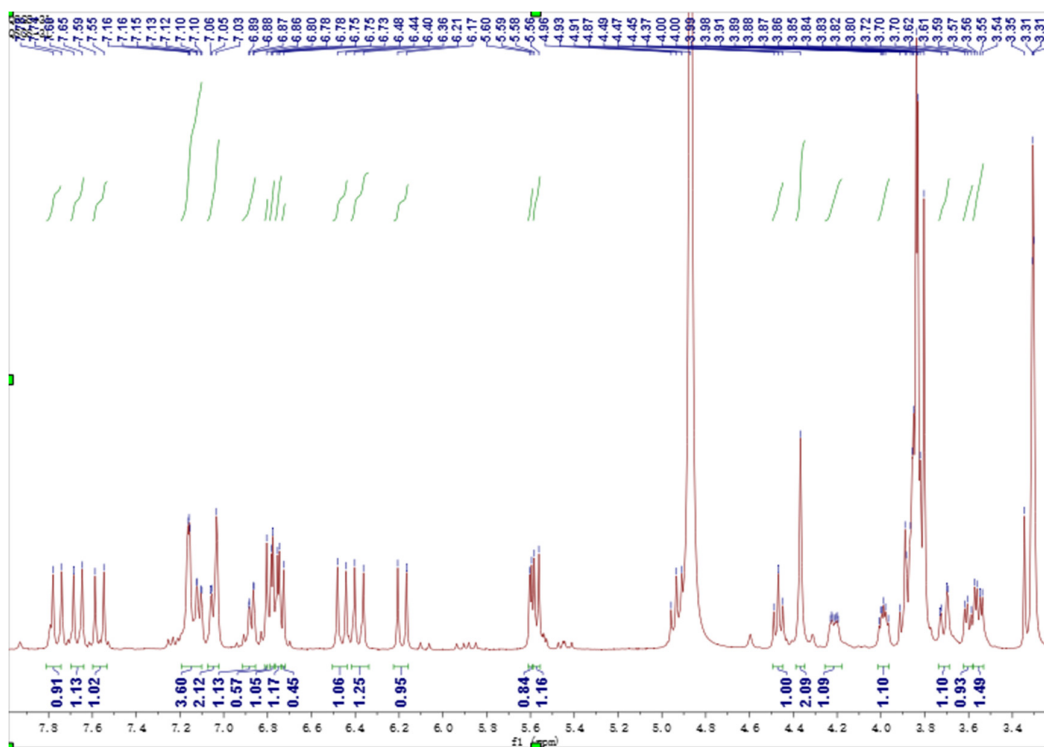

Figure S7. The  $^1\text{H}$  NMR spectrum of **1** in  $\text{CD}_3\text{OD}$

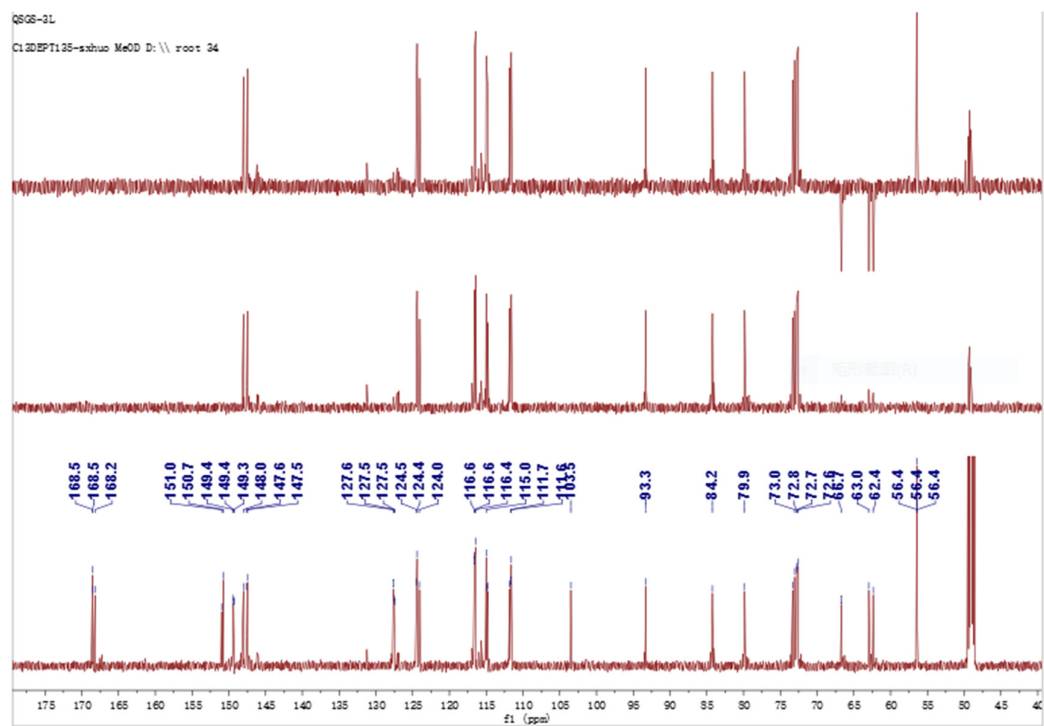

Figure S8. The  $^{13}\text{C}$  NMR and DEPT spectra of **1** in  $\text{CD}_3\text{OD}$

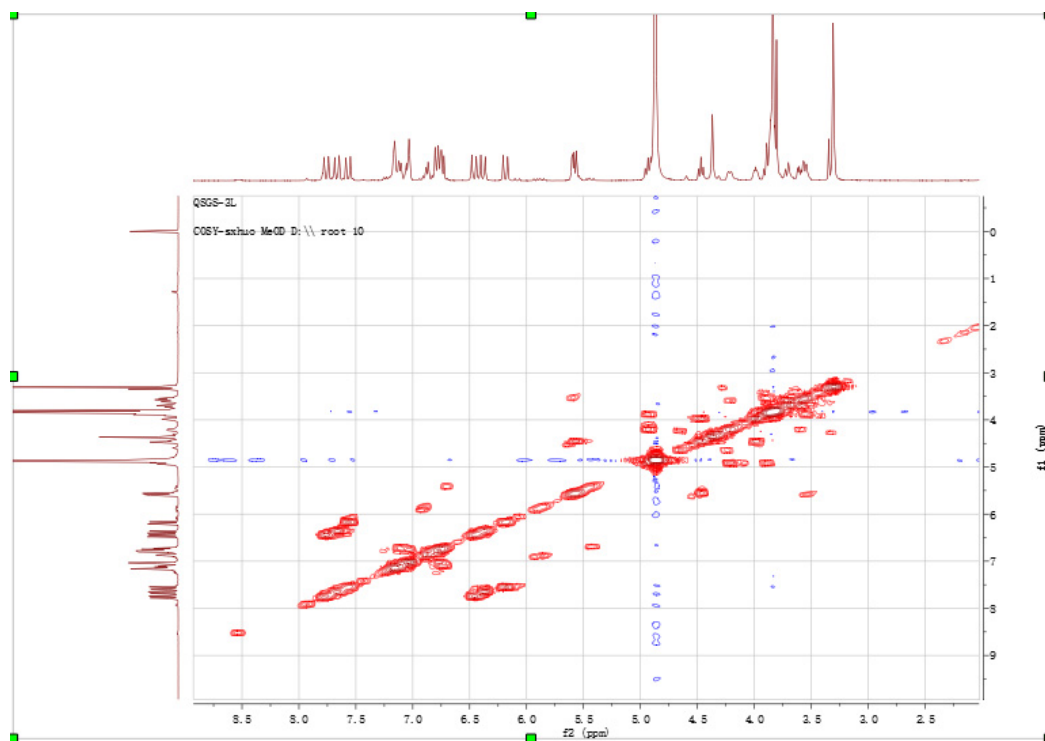

Figure S9.  $^1\text{H}$ - $^1\text{H}$  COSY spectrum of **1** in  $\text{CD}_3\text{OD}$

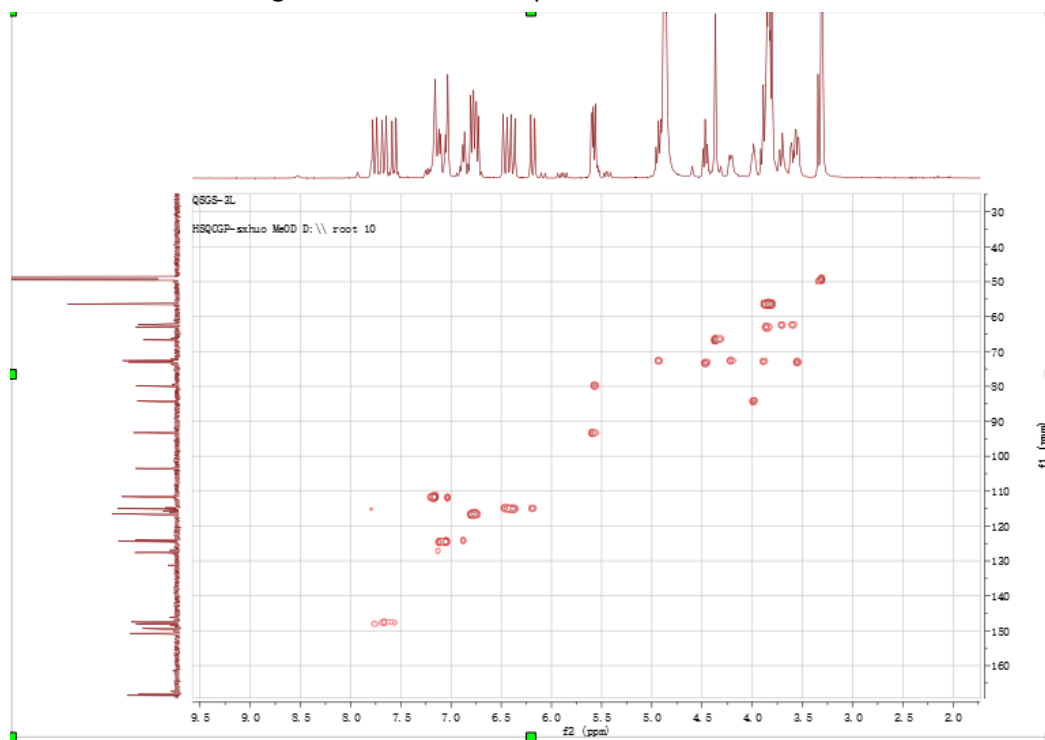

Figure S10. HSQC spectrum of **1** in  $\text{CD}_3\text{OD}$

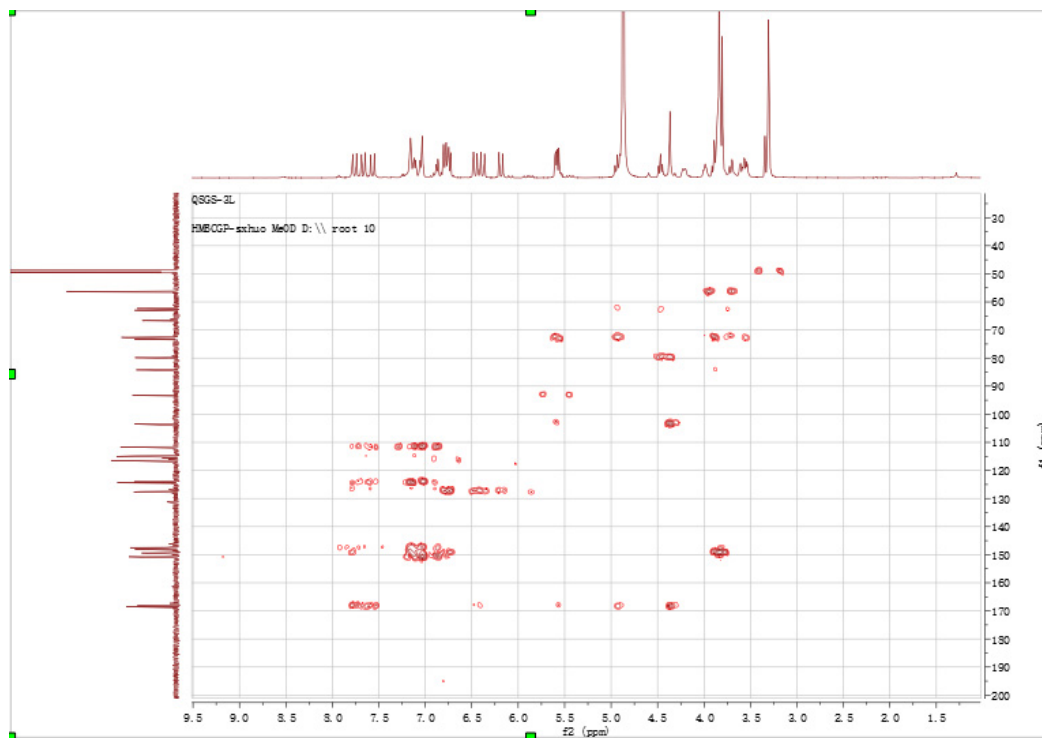

Figure S11. HMBC spectrum of **1** in CD<sub>3</sub>OD

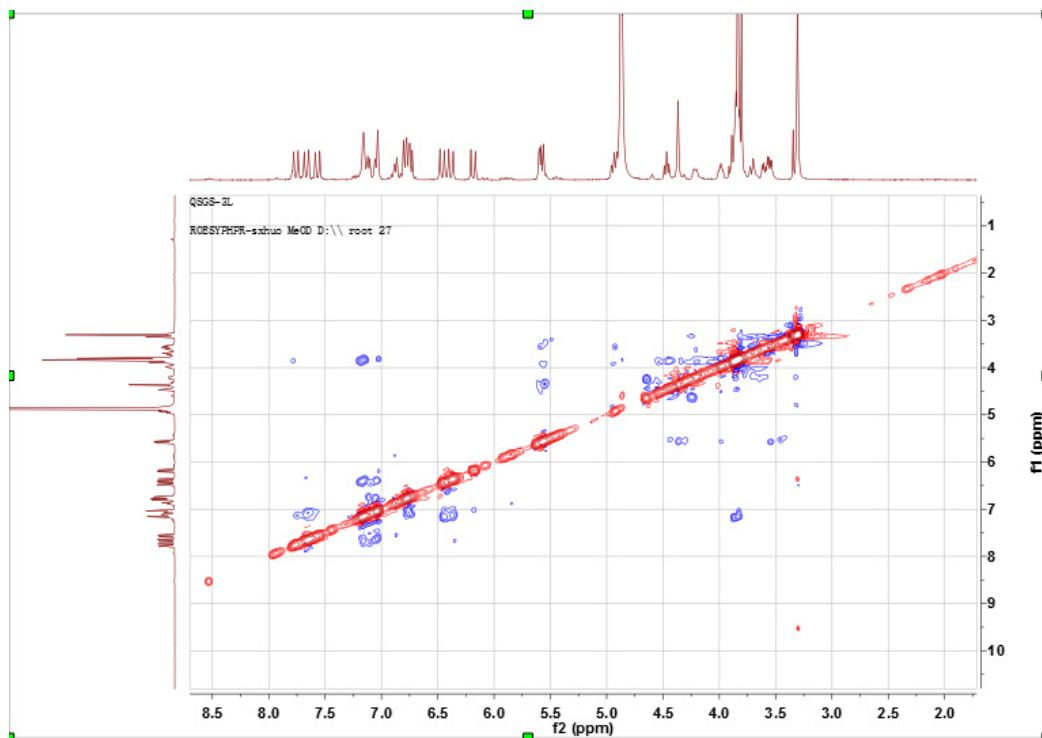

Figure S12. ROESY spectrum of **1** in CD<sub>3</sub>OD

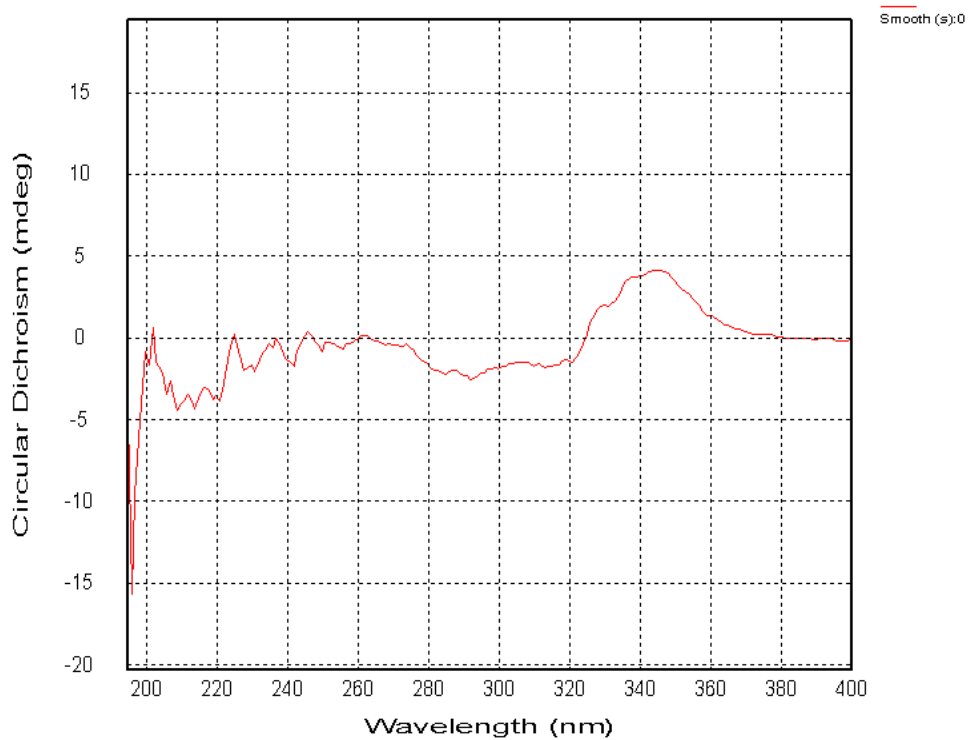

Figure S13. CD spectrum of **1**

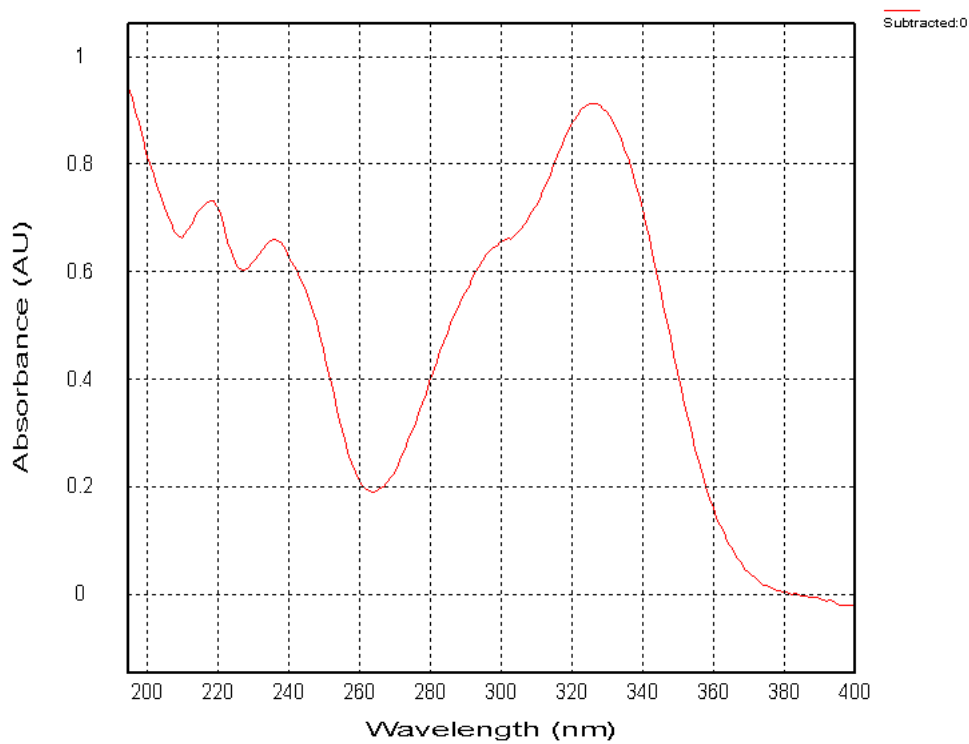



Figure S14. UV spectrum of 1

Formula Predictor Report - QSGS-3L.lcd

Page 1 of 1

Data File: E:\DATA\2017\0927\QSGS-3L.lcd

| Elmt | Val. | Min | Max | Elmt | Val. | Min | Max | Elmt | Val. | Min | Max | Elmt | Val. | Min | Max | Use Adduct |
|------|------|-----|-----|------|------|-----|-----|------|------|-----|-----|------|------|-----|-----|------------|
| H    | 1    | 0   | 100 | O    | 2    | 0   | 50  | P    | 3    | 0   | 0   | Br   | 1    | 0   | 0   | Na         |
| B    | 3    | 0   | 0   | F    | 1    | 0   | 0   | S    | 2    | 0   | 5   | I    | 3    | 0   | 0   |            |
| C    | 4    | 0   | 100 | Na   | 1    | 0   | 0   | Cl   | 1    | 0   | 0   | Pt   | 2    | 0   | 0   |            |
| N    | 3    | 0   | 0   | Mg   | 2    | 0   | 0   | Fe   | 2    | 0   | 0   |      |      |     |     |            |

Error Margin (ppm): 5  
 DBE Range: -2.0 - 100.0  
 Electron Ions: both  
 HC Ratio: unlimited  
 Apply N Rule: yes  
 Use MSn Info: yes  
 Max Isotopes: all  
 Isotope RI (%): 1.00  
 Isotope Res: 10000  
 MSn Iso RI (%): 75.00  
 MSn Logic Mode: AND  
 Max Results: 10

Event#: 1 MS(E+) Ret. Time : 0.390 -> 0.470 Scan#: 79 -> 95

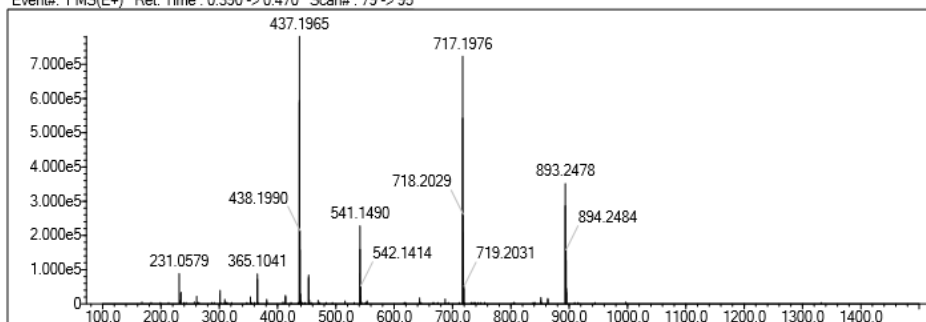

Measured region for 893.2478 m/z

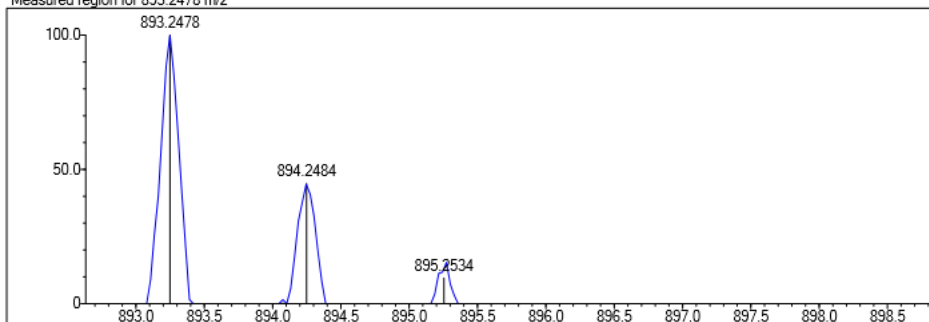

C42 H46 O20 [M+Na]+ : Predicted region for 893.2475 m/z

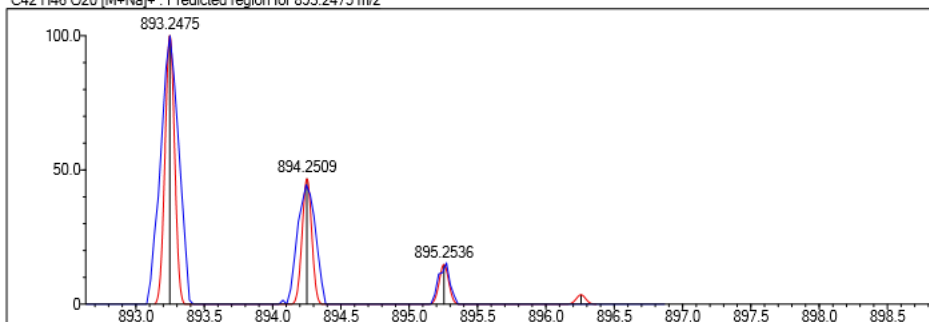

| Formula (M) | Ion     | Meas. m/z | Pred. m/z | Df. (mDa) | Df. (ppm) | DBE  |
|-------------|---------|-----------|-----------|-----------|-----------|------|
| C42 H46 O20 | [M+Na]+ | 893.2478  | 893.2475  | 0.3       | 0.34      | 20.0 |

Figure S15. HRESIMS of 1

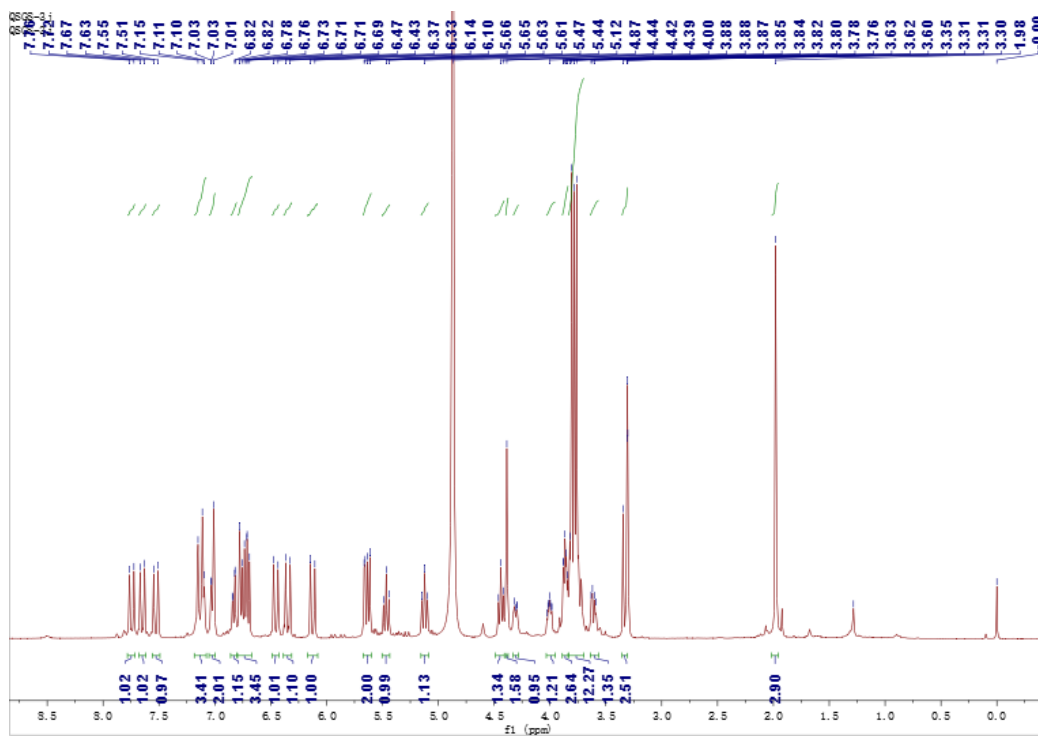

Figure S16. The  $^1\text{H}$  NMR spectrum of **2** in  $\text{CD}_3\text{OD}$

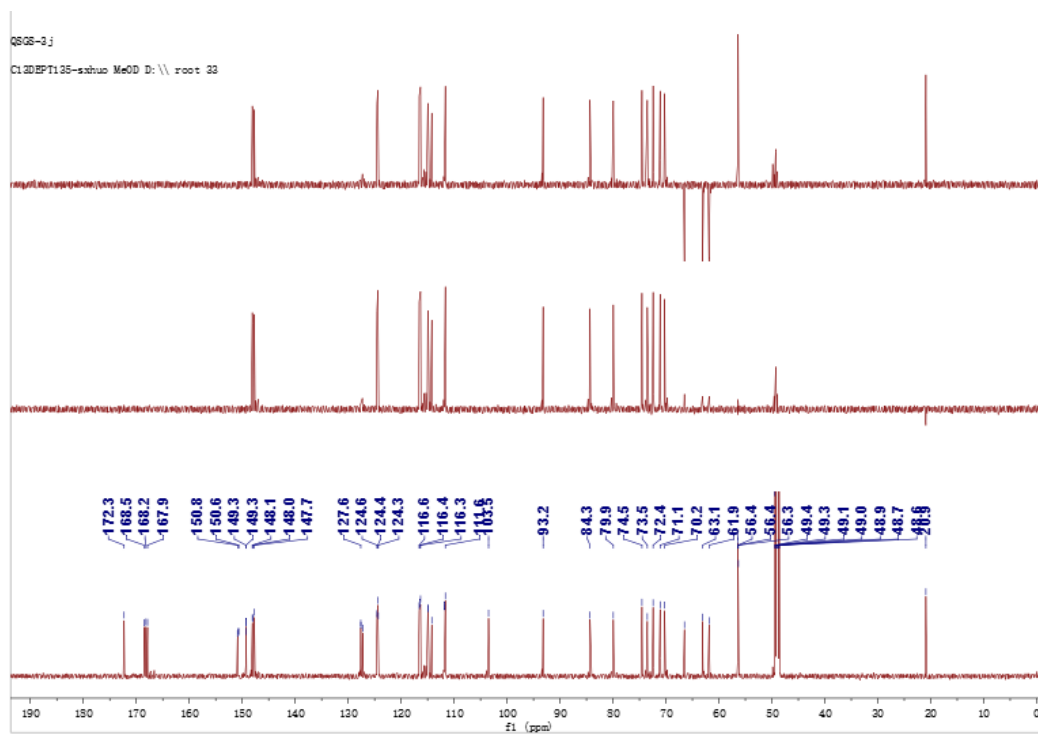

Figure S17. The  $^{13}\text{C}$  NMR and DEPT spectra of **2** in  $\text{CD}_3\text{OD}$

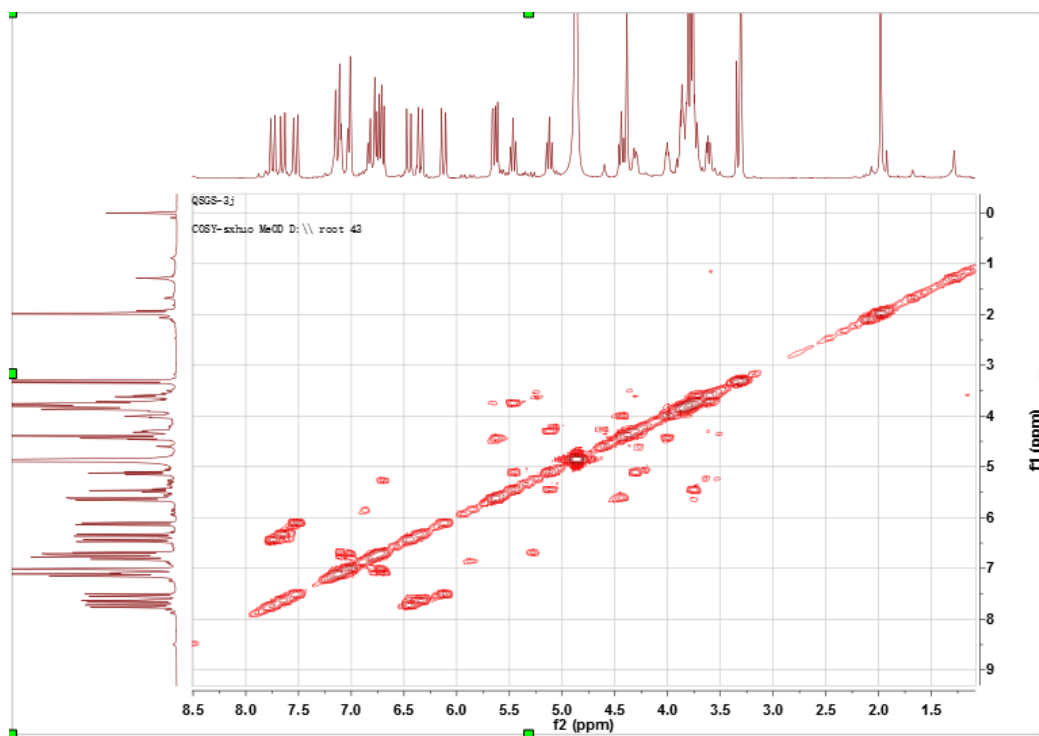

Figure S18.  $^1\text{H}$ - $^1\text{H}$  COSY spectrum of **2**

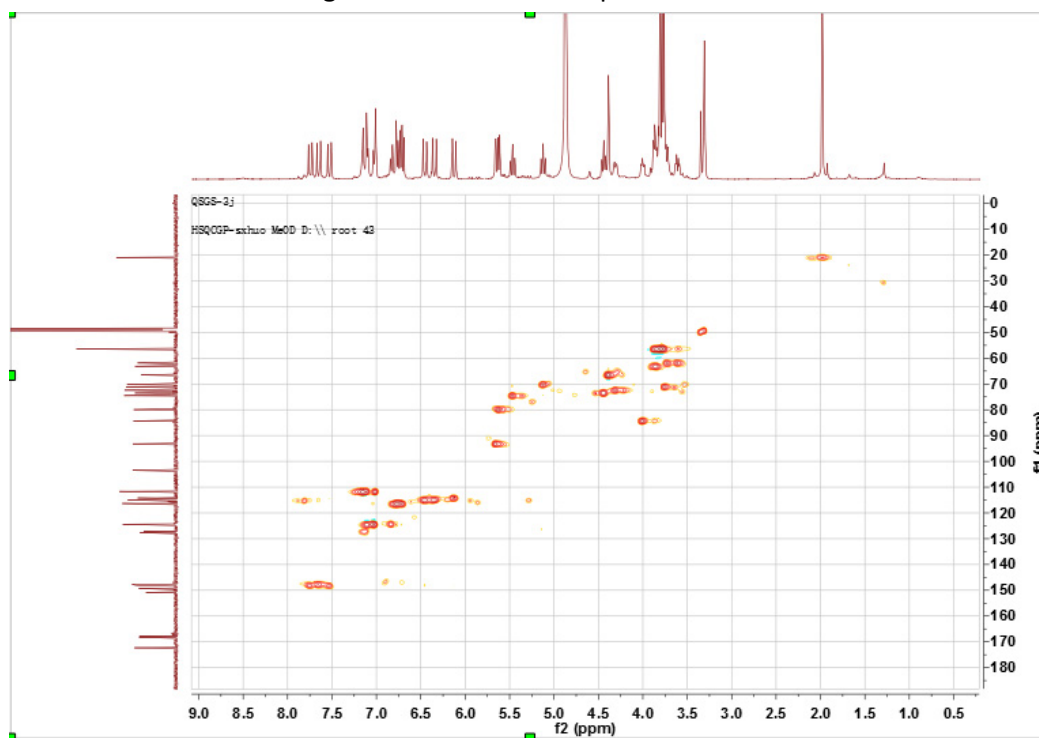

Figure S19. HSQC spectrum of **2**

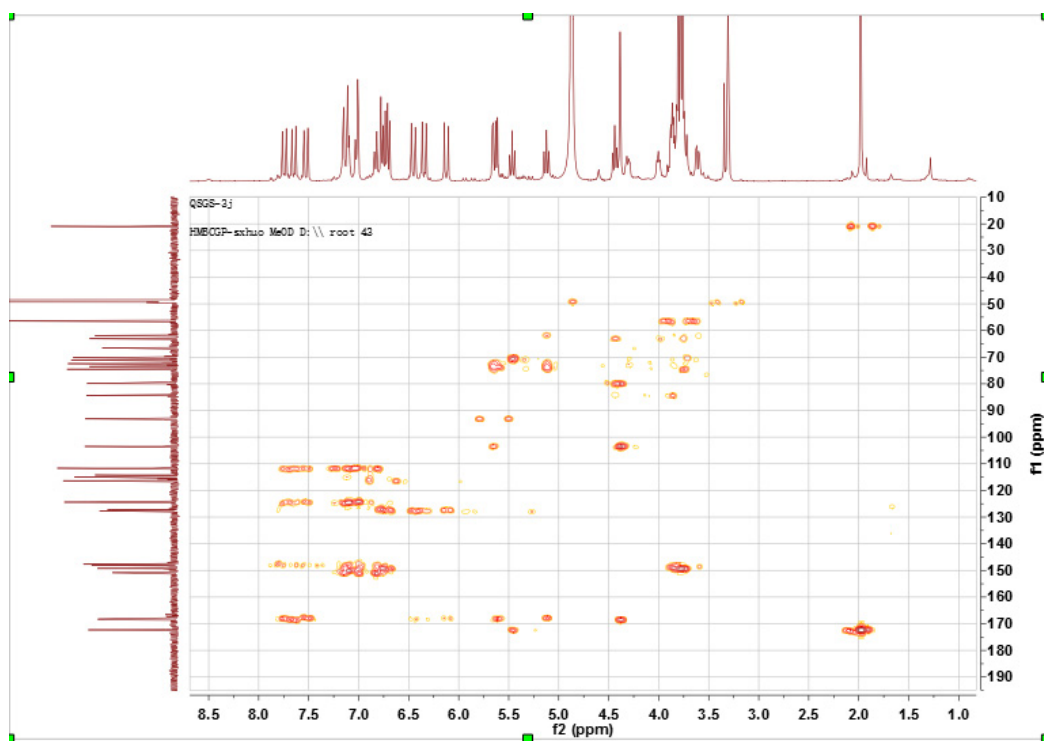

Figure S20. HMBC spectrum of **2**

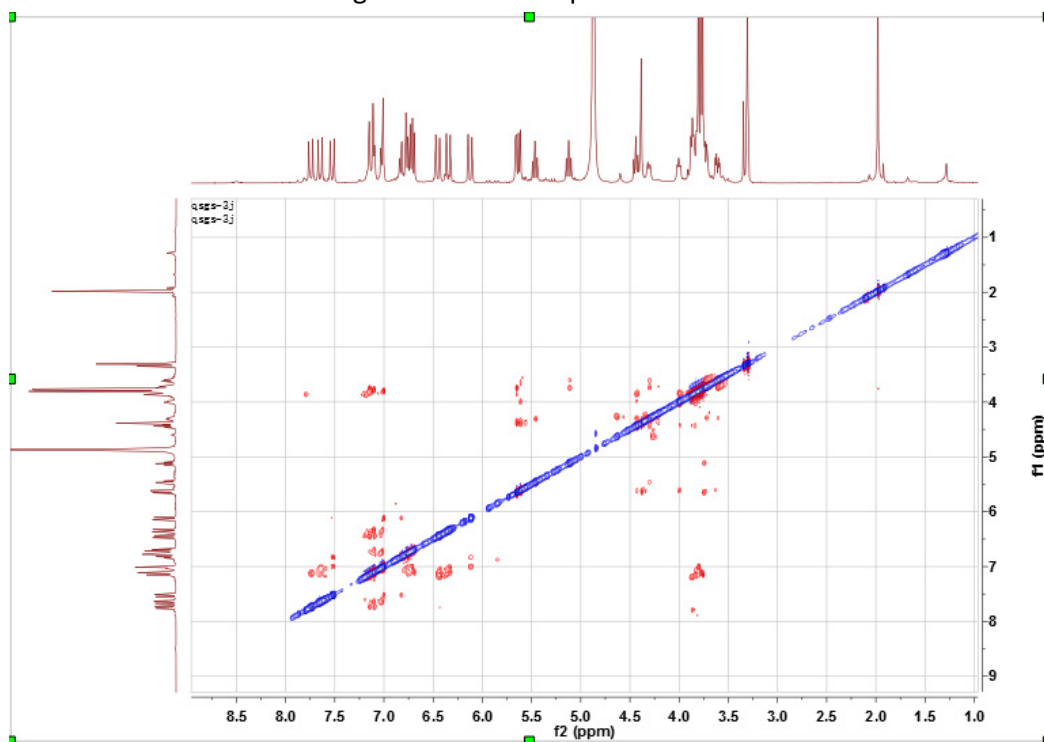

Figure S21. ROESY spectrum of **2**

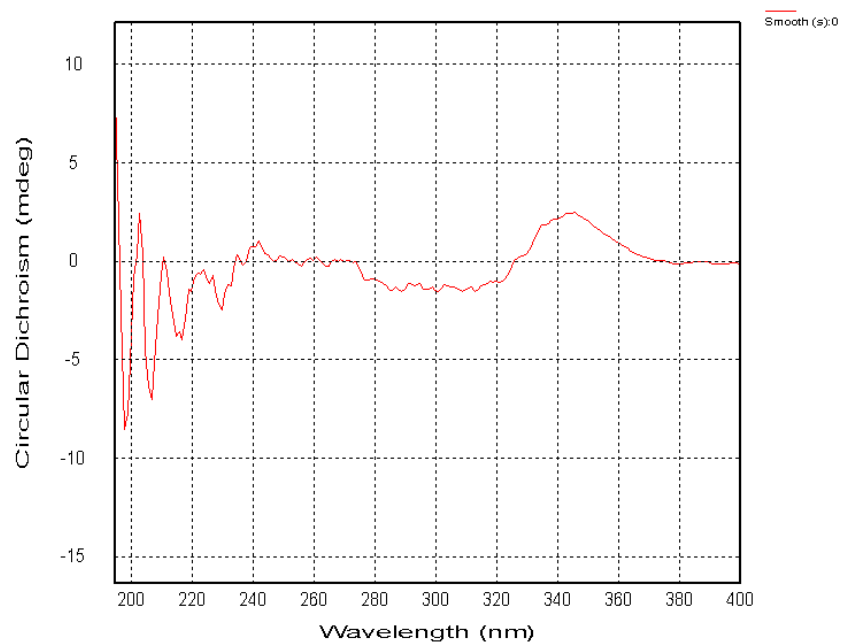

Figure S22. CD spectrum of **2**

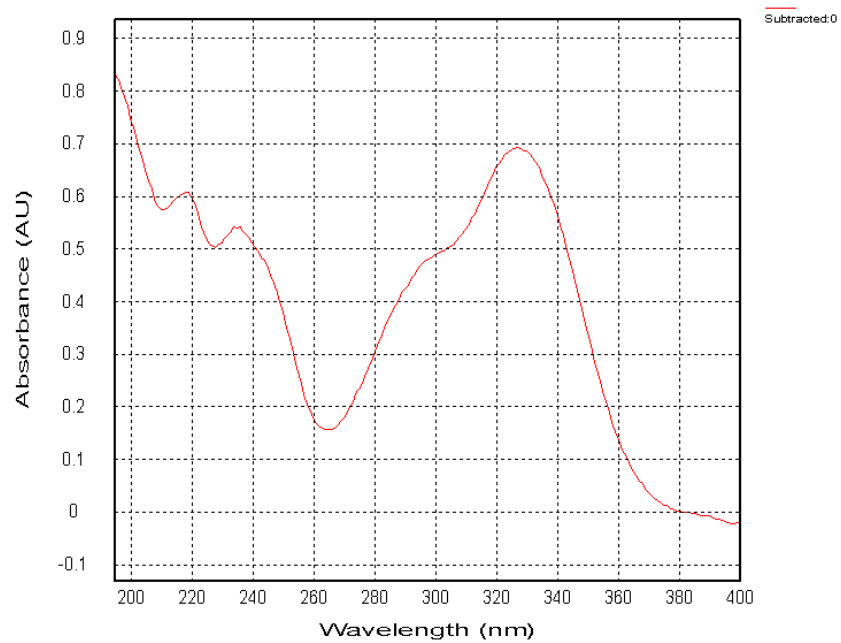

Figure S23. UV spectrum of **2**

Data File: E:\DATA\2017\0927\QSGS-3j.lcd

| Elmt | Val. | Min | Max | Elmt | Val. | Min | Max | Elmt | Val. | Min | Max | Elmt | Val. | Min | Max | Use Adduct |
|------|------|-----|-----|------|------|-----|-----|------|------|-----|-----|------|------|-----|-----|------------|
| H    | 1    | 0   | 100 | O    | 2    | 0   | 50  | P    | 3    | 0   | 0   | Br   | 1    | 0   | 0   | Na         |
| B    | 3    | 0   | 0   | F    | 1    | 0   | 0   | S    | 2    | 0   | 5   | I    | 3    | 0   | 0   |            |
| C    | 4    | 0   | 100 | Na   | 1    | 0   | 0   | Cl   | 1    | 0   | 0   | Pt   | 2    | 0   | 0   |            |
| N    | 3    | 0   | 0   | Mg   | 2    | 0   | 0   | Fe   | 2    | 0   | 0   |      |      |     |     |            |

Error Margin (ppm): 5  
 DBE Range: -2.0 - 100.0  
 Electron Ions: both  
 HC Ratio: unlimited  
 Apply N Rule: yes  
 Use MSn Info: yes  
 Max Isotopes: all  
 Isotope RI (%): 1.00  
 MSn Iso RI (%): 75.00  
 MSn Logic Mode: AND  
 Isotope Res: 10000  
 Max Results: 10

Event#: 1 MS(E+) Ret. Time : 0.320 -> 0.480 Scan#: 65 -> 97

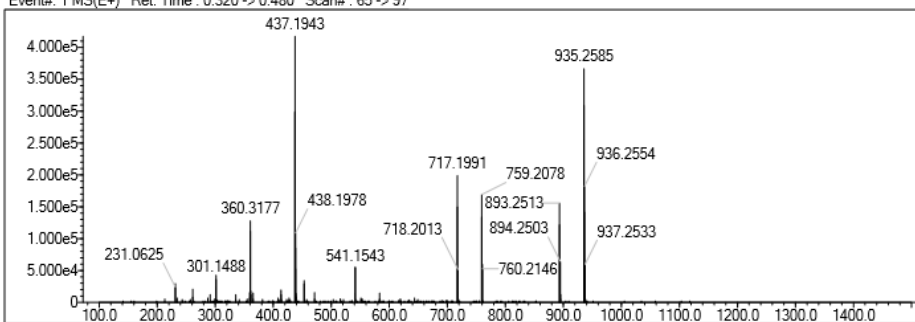

Measured region for 935.2585 m/z

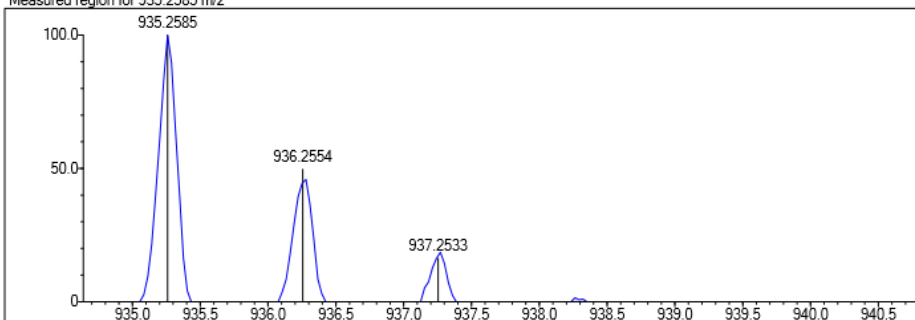

C44 H48 O21 [M+Na]+ : Predicted region for 935.2580 m/z

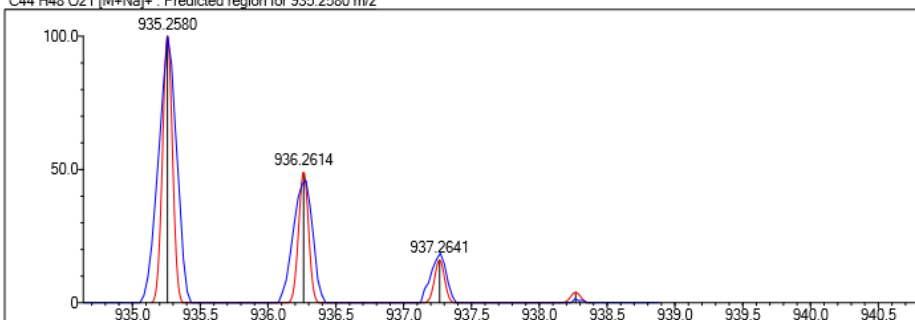

| Formula (M) | Ion     | Meas. m/z | Pred. m/z | Df. (mDa) | Df. (ppm) | DBE  |
|-------------|---------|-----------|-----------|-----------|-----------|------|
| C44 H48 O21 | [M+Na]+ | 935.2585  | 935.2580  | 0.5       | 0.53      | 21.0 |

Figure S24. HRESIMS of 2
